# Supplementary material for: Emerging investigator series: the role of vegetation in bioretention for stormwater treatment in the built environment: pollutant removal, hydrologic function, and ancillary benefits
Source: Royal Society of Chemistry journal article supplement (doi:10.1039/c7ew00511c), 2018-01-01
Supplement: c7ew00511c1.pdf [file c7ew00511c1.pdf]

Electronic Supplementary Information for:

**The Role of Vegetation in Bioretention for  
Stormwater Treatment in the Built  
Environment: Pollutant Removal, Hydrologic  
Function, and Ancillary Benefits**

*Claire P. Muerdter,<sup>1,2</sup> Carol K. Wong,<sup>3,4</sup> Gregory H. LeFevre<sup>1,2\*</sup>*

<sup>1</sup>Department of Civil & Environmental Engineering, University of Iowa, Iowa City IA, United States; <sup>2</sup>IIHR—Hydroscience and Engineering, University of Iowa, Iowa City IA, United States;

<sup>3</sup>Department of Civil and Environmental Engineering, Stanford University, Stanford, CA 94305, United States; <sup>4</sup>Center for Watershed Protection, Ellicott City MD, United States (Current

Affiliation)

**\*Corresponding Author:**

Email: [gregory-lefevre@uiowa.edu](mailto:gregory-lefevre@uiowa.edu); Phone: 319-335-5655; 4105 Seamans Center, Iowa City, Iowa, 52242, United States

## *Representative Vegetation Bioretention Design Resources*

### *USA*

| <b>Region</b>                           | <b>Resource Name</b>                                                  | <b>Author</b>                                                                                         | <b>Date Published/ Updated</b> | <b>URL</b>                                                                                                                                                                                                                                                                                  |
|-----------------------------------------|-----------------------------------------------------------------------|-------------------------------------------------------------------------------------------------------|--------------------------------|---------------------------------------------------------------------------------------------------------------------------------------------------------------------------------------------------------------------------------------------------------------------------------------------|
| US Mid-Atlantic                         | Maryland Stormwater Design Manual                                     | Maryland Department of the Environment                                                                | 2009                           | <a href="http://www.mde.maryland.gov/programs/water/StormwaterManagementProgram/Pages/stormwater_design.aspx">http://www.mde.maryland.gov/programs/water/StormwaterManagementProgram/Pages/stormwater_design.aspx</a>                                                                       |
| US New England                          | Native Plants for New England Rain Gardens                            | University of New Hampshire Cooperative Extension, New Hampshire Department of Environmental Services | 2016                           | <a href="https://extension.unh.edu/resources/files/Resource005899_Rep8265.pdf">https://extension.unh.edu/resources/files/Resource005899_Rep8265.pdf</a>                                                                                                                                     |
| US Southeast                            | Plants for Rain Gardens Recommended for Southeastern North Carolina   | North Carolina Cooperative Extension                                                                  | Not dated                      | <a href="https://www.ces.ncsu.edu/wp-content/uploads/2013/04/Coastal-Plains-Plants.doc">https://www.ces.ncsu.edu/wp-content/uploads/2013/04/Coastal-Plains-Plants.doc</a>                                                                                                                   |
| US Upper Midwest                        | Plants for Stormwater Design: Species Selection for the Upper Midwest | Daniel Shaw, Rusty Schmidt, Minnesota Pollution Control Agency                                        | 2003                           | <a href="http://www.pca.state.mn.us/index.php/water/water-types-and-programs/stormwater/stormwater-management/plants-for-stormwater-design.html">http://www.pca.state.mn.us/index.php/water/water-types-and-programs/stormwater/stormwater-management/plants-for-stormwater-design.html</a> |
| US Midwest                              | Stormwater Management: Plant Selection for Rain Gardens in Nebraska   | University of Nebraska–Lincoln                                                                        | 2007                           | <a href="http://extensionpublications.unl.edu/assets/pdf/g1759.pdf">http://extensionpublications.unl.edu/assets/pdf/g1759.pdf</a>                                                                                                                                                           |
| US Southwest/arid regions               | Plant Selection for Bioretention in the Arid West                     | Houdeshel, C.D. and Pomeroy, C.A.                                                                     | 2010                           | <a href="http://ascelibrary.org/doi/pdf/10.1061/41099(367)127">http://ascelibrary.org/doi/pdf/10.1061/41099(367)127</a>                                                                                                                                                                     |
| US Pacific Northwest/Canadian Southwest | Low Impact Development: Technical Guidance Manual for Puget           | Washington State University Extension, Puget Sound Partnership                                        | 2012                           | <a href="http://www.psp.wa.gov/downloads/LID/2012_1221_LIDmanual_FINAL_secure.pdf">http://www.psp.wa.gov/downloads/LID/2012_1221_LIDmanual_FINAL_secure.pdf</a>                                                                                                                             |

|                              |                                                          |                                                    |           |                                                                                                                                                                                             |
|------------------------------|----------------------------------------------------------|----------------------------------------------------|-----------|---------------------------------------------------------------------------------------------------------------------------------------------------------------------------------------------|
|                              | Sound                                                    |                                                    |           |                                                                                                                                                                                             |
| US central Californian coast | LID Plant Guidance for Bioretention                      | Central Coast Water Board, UC Davis LID Initiative | Not dated | <a href="http://ucanr.edu/sites/mgslo/files/147107.pdf">http://ucanr.edu/sites/mgslo/files/147107.pdf</a>                                                                                   |
| US Alaska                    | Green Infrastructure Project Guide for Fairbanks, Alaska | Fairbanks Green Infrastructure Group               | 2015      | <a href="http://www.fairbankssoilwater.org/user-files/pdfs/GI_Manual_January2015.pdf">http://www.fairbankssoilwater.org/user-files/pdfs/GI_Manual_January2015.pdf</a>                       |
| US Hawaii                    | Hawai'i Residential Rain Garden Manual                   | Hui o Ko'olaupoko                                  | Not dated | <a href="http://www.huihawaii.org/uploads/1/6/6/3/16632890/raingardenmanual-web-res-smaller.pdf">http://www.huihawaii.org/uploads/1/6/6/3/16632890/raingardenmanual-web-res-smaller.pdf</a> |

*Outside of the USA*

| <b>Region</b>              | <b>Resource Name</b>                                                                   | <b>Author</b>                                      | <b>Date Updated</b>                             | <b>URL</b>                                                                                                                                                                                |
|----------------------------|----------------------------------------------------------------------------------------|----------------------------------------------------|-------------------------------------------------|-------------------------------------------------------------------------------------------------------------------------------------------------------------------------------------------|
| Australia                  | Vegetation Guidelines for Stormwater Biofilters in the South-West of Western Australia | Monash University Water for Liveability Centre     | 2014                                            | <a href="http://www.sercul.org.au/docs/381_Biofilter_vegetation_guidelines_for_southwestWA.pdf">http://www.sercul.org.au/docs/381_Biofilter_vegetation_guidelines_for_southwestWA.pdf</a> |
| Singapore/Tropical Regions | A Selection of Plants for Bioretention Systems in the Tropics                          | Benjamin Loh                                       | Not dated. Discusses study conducted 2010–2011. | <a href="http://www.cuge.com.sg/research/download.php?product=47">http://www.cuge.com.sg/research/download.php?product=47</a>                                                             |
| United Kingdom             | (UK) Rain Garden Guide                                                                 | Bob Bray, Gary Grant, Dusty Gedge, Lani Leuthvilay | Not dated                                       | <a href="https://raingardens.info/wp-content/uploads/2012/07/UKRainGarden-Guide.pdf">https://raingardens.info/wp-content/uploads/2012/07/UKRainGarden-Guide.pdf</a>                       |

## ***Biomass Energy Production Calculations and Assumptions***

### *Calculation Assumptions:*

- 1.4 kg per m<sup>2</sup> per year yield of switchgrass biomass (converted from 6 tons per acre per year given in source)<sup>1</sup>
- Bioretention area of 102 square meters<sup>2</sup>
- 1.6 x 10<sup>4</sup> kJ per kg of switchgrass<sup>3</sup>
- Assuming one harvest per year
- 0.25 gallons of gas is used in a brushcutter for harvesting
- 15 miles total are needed to transport the biomass to the power plant
- Transportation to the power plant is in a dump truck that gets 5 miles per gallon
- Both the dump truck and brushcutter use E10 gasoline (*i.e.*, 10% ethanol)
- E10 gasoline generates 112,400 BTU/gallon (net)<sup>4</sup>

### *kJ Produced Per Year:*

$$\frac{1.4 \text{ kg switchgrass biomass}}{\text{m}^2 \text{ yr}} \times 102 \text{ m}^2 \times \frac{1.6 \times 10^4 \text{ kJ}}{\text{kg switchgrass biomass}} = \frac{2.3 \times 10^6 \text{ kJ}}{\text{yr}}$$

### *kJ Used for Biomass Harvest and Transport:*

Harvest:

$$0.25 \text{ gallons E10 gas} \times \frac{112,400 \text{ BTU}}{\text{gallon E10 gas}} \times \frac{1.06 \text{ kJ}}{1 \text{ BTU}} = 29,786 \text{ kJ}$$

Transport:

$$15 \text{ miles} \times \frac{\text{gallon E10 gas}}{5 \text{ miles}} \times \frac{112,400 \text{ BTU}}{\text{gallon E10 gas}} \times \frac{1.06 \text{ kJ}}{1 \text{ BTU}} = 357,432 \text{ kJ}$$

Total Harvest + Transport:

$$29,786 \text{ kJ} + 357,432 \text{ kJ} = 387,218 \text{ kJ}$$

*Net Production per Year:*

$$2.3 \times 10^6 \text{ kJ} - 387,218 \text{ kJ} = 1.9 \times 10^6 \text{ kJ}$$

Or

$$1.9 \times 10^6 \text{ kJ} \times \frac{1 \text{ kWh}}{3,600 \text{ kJ}} = 527 \text{ kWh}$$

**Sources:**

- (1) *Switchgrass for Biomass*; University of Kentucky College of Agriculture New Crop Opportunities Center; **2009**. [https://www.uky.edu/Ag/Forage/switchgrass\(11-2009\)1.pdf](https://www.uky.edu/Ag/Forage/switchgrass(11-2009)1.pdf).
- (2) Muerdter, C.; Özkök, E.; Li, L.; Davis, A. P. Vegetation and Media Characteristics of an Effective Bioretention Cell. *J. Sustain. Water Built Environ.* **2016**, 2 (1), 4015008.
- (3) Sami, M.; Annamalai, K.; Woolridge, M. Co-firing of coal and biomass fuel blends. *Prog. Energy Combust. Sci.* **2001**, 27 (2), 171–214.
- (4) Oak Ridge National Laboratory. *Appendix B - Transportation Energy Data Book*; **2016**. [http://cta.ornl.gov/data/appendix\\_b.shtml](http://cta.ornl.gov/data/appendix_b.shtml)
